# Supplementary material
Source: HighWire-hosted journal article supplement (https://www.cmajopen.ca/highwire/filestream/87013/field_highwire_adjunct_files/1/2021-0044-2-at.pdf)
Supplement: 2021-0044-2-at.pdf [file 2021-0044-2-at.pdf]

## Supplemental Appendix 2

**Table 1. Comparison of SARS-CoV-2 seropositivity by predictor**

|                                         | <b>SARS-CoV-2<br/>Serology Positive<br/>(n= 57)</b> | <b>SARS-CoV-2<br/>Serology Negative<br/>(n= 1005)</b> |
|-----------------------------------------|-----------------------------------------------------|-------------------------------------------------------|
| Age, median (IQR)                       | 36 (30,48)                                          | 40 (32,51)                                            |
| Sex, female n (%)                       | 48 (87)                                             | 786 (79)                                              |
| Any Comorbidity / underlying conditions | 16 (30)                                             | 370 (37)                                              |
| Hospital Site                           |                                                     |                                                       |
| SickKids                                | 24 (42)                                             | 352 (35)                                              |
| LHSC                                    | 12 (21)                                             | 337 (34)                                              |
| MSH                                     | 21 (37)                                             | 316 (31)                                              |
| Role                                    |                                                     |                                                       |
| HCP                                     | 40 (70)                                             | 670 (67)                                              |
| Allied Health                           | 5 (9)                                               | 154 (15)                                              |
| Auxiliary                               | 3 (5)                                               | 73 (7)                                                |
| Other                                   | 9 (16)                                              | 106 (11)                                              |
| HCP Role                                |                                                     |                                                       |
| Nurse                                   | 25 (44)                                             | 423 (42)                                              |
| Physician                               | 14 (25)                                             | 223 (22)                                              |
| Nurse Practitioner                      | 1 (2)                                               | 14 (1)                                                |
| Respiratory Therapy                     | 2 (4)                                               | 50 (5)                                                |
| Environmental Services                  | 0 (0)                                               | 13 (1)                                                |
| Work place                              |                                                     |                                                       |
| COVID-19 Assessment Center              | 8 (14)                                              | 29 (3)                                                |
| Emergency Department                    | 17 (30)                                             | 289 (29)                                              |
| Critical Care                           | 8 (14)                                              | 237 (24)                                              |

|                                                                                       |         |          |
|---------------------------------------------------------------------------------------|---------|----------|
| Travel after Jan 1 (outside of Canada)                                                | 18 (32) | 384 (38) |
| Household reporting 3 or more individuals in the house (including the HCW)            | 27 (51) | 575 (59) |
| Number with children in the household (< 18 yrs)                                      | 19 (33) | 382 (38) |
| Worked on a COVID-19 outbreak unit                                                    | 5 (9)   | 115 (12) |
| Diagnosed with SARS-CoV-1 / MERS                                                      | 1 (2)   | 1 (0.5)  |
| How often do you leave the house per week outside of work? > 5 times vs. other        | 18 (34) | 302 (31) |
| When leave the house, wear facemask all the time vs. most of the time/sometimes/never | 23 (40) | 325 (33) |
| When leave the house, physical distancing always vs. most of the time/sometimes/never | 27 (51) | 542 (56) |

**Table 2. Clinical Symptoms of HCW testing positive for SARS-CoV-2 antibodies at baseline**

| Symptom                    | Number of seropositive HCW reporting symptoms(%)<br>(n = 48) |
|----------------------------|--------------------------------------------------------------|
| Asymptomatic / No symptoms | 25 (52)                                                      |
| Isolated Symptom           | 1 (2)                                                        |
| >=2 symptoms               | 22 (46)                                                      |
| Fever                      | 12 (25)                                                      |
| Chills                     | 11 (23)                                                      |
| Cough                      | 17 (35)                                                      |
| Shortness of Breath        | 11 (23)                                                      |

Appendix 2, as supplied by the authors. Appendix to: Science M, Bolotin S, Silverman M, et al. SARS-CoV-2 antibodies in Ontario health care workers during and after the first wave of the pandemic: a cohort study. *CMAJ Open* 2021. doi: 10.9778/cmajo.20210044. Copyright © 2021 The Author(s) or their employer(s). To receive this resource in an accessible format, please contact us at [cmajgroup@cmaj.ca](mailto:cmajgroup@cmaj.ca).

|                  |         |
|------------------|---------|
| Sore Throat      | 4 (8)   |
| Fatigue          | 17 (35) |
| Muscle Aches     | 10 (21) |
| Runny nose       | 11 (23) |
| Chest Pain       | 5 (10)  |
| Abdominal Pain   | 1 (2)   |
| Diarrhea         | 7 (15)  |
| Vomiting         | 3 (6)   |
| Loss of appetite | 6 (13)  |
| Headache         | 10 (21) |
| Ageusia          | 7 (15)  |
| Anosmia          | 7 (15)  |
| Joint pains      | 6 (13)  |
| Rash             | 1 (2)   |
